# Supplementary material for: The American Society for Clinical Pathology’s Job Satisfaction, Well-Being, and Burnout Survey of Laboratory Professionals
Source: Oxford University Press journal article supplement (doi:10.1093/ajcp/aqaa008), 2020-01-13
Supplement: aqaa008_suppl_supplementary_figures.docx [file aqaa008_suppl_supplementary_figures.docx]

Figure 1. Level of satisfaction with current job in the laboratory by employment status.

Figure 2. Job satisfaction among laboratory professionals by facility.

Figure 3. Job satisfaction among laboratory professionals by department.

Figure 4. Job satisfaction among laboratory professionals by region.

*Central Northeast: Illinois, Indiana, Michigan, Ohio, and Wisconsin. Central Northwest: Iowa, Kansas, Minnesota, Missouri, Nebraska, North Dakota, and

South Dakota. Central Southwest: Arkansas, Louisiana, Oklahoma, and Texas. Far West: Alaska, Arizona, California, Colorado, Hawaii, Idaho, Montana, Nevada,

New Mexico, Oregon, Utah, Washington, and Wyoming. Northeast: Connecticut, Maine, Massachusetts, New Hampshire, New Jersey, New York, Pennsylvania,

Rhode Island, and Vermont. South Central Atlantic: Alabama, Delaware, District of Columbia, Florida, Georgia, Kentucky, Maryland, Mississippi, North Carolina,

South Carolina, Tennessee, Virginia, and West Virginia.

Figure 5. Job stress among laboratory professionals by facility.

Figure 6. Job stress among laboratory professionals by department.

Figure 7. Job stress among laboratory professionals by region.

*Central Northeast: Illinois, Indiana, Michigan, Ohio, and Wisconsin. Central Northwest: Iowa, Kansas, Minnesota, Missouri, Nebraska, North Dakota, and

South Dakota. Central Southwest: Arkansas, Louisiana, Oklahoma, and Texas. Far West: Alaska, Arizona, California, Colorado, Hawaii, Idaho, Montana, Nevada,

New Mexico, Oregon, Utah, Washington, and Wyoming. Northeast: Connecticut, Maine, Massachusetts, New Hampshire, New Jersey, New York, Pennsylvania,

Rhode Island, and Vermont. South Central Atlantic: Alabama, Delaware, District of Columbia, Florida, Georgia, Kentucky, Maryland, Mississippi, North Carolina,

South Carolina, Tennessee, Virginia, and West Virginia

Figure 8. Percentage of respondents who had experienced burnout by employment status.

Figure 9. Percentage of respondents who had experienced burnout by facility.

Figure 10. Percentage of respondents who had experienced burnout by department.

Figure 11. Percentage of respondents who had experienced burnout by region.

*Central Northeast: Illinois, Indiana, Michigan, Ohio, and Wisconsin. Central Northwest: Iowa, Kansas, Minnesota, Missouri, Nebraska, North Dakota, and

South Dakota. Central Southwest: Arkansas, Louisiana, Oklahoma, and Texas. Far West: Alaska, Arizona, California, Colorado, Hawaii, Idaho, Montana, Nevada,

New Mexico, Oregon, Utah, Washington, and Wyoming. Northeast: Connecticut, Maine, Massachusetts, New Hampshire, New Jersey, New York, Pennsylvania,

Rhode Island, and Vermont. South Central Atlantic: Alabama, Delaware, District of Columbia, Florida, Georgia, Kentucky, Maryland, Mississippi, North Carolina,

South Carolina, Tennessee, Virginia, and West Virginia.

Figure 12. Percentage of respondents by work-life balance quality and facility.

Figure 13. Percentage of respondents by work-life balance quality and department.

Figure 14. Percentage of respondents by work-life balance quality and region.

*Central Northeast: Illinois, Indiana, Michigan, Ohio, and Wisconsin. Central Northwest: Iowa, Kansas, Minnesota, Missouri, Nebraska, North Dakota, and

South Dakota. Central Southwest: Arkansas, Louisiana, Oklahoma, and Texas. Far West: Alaska, Arizona, California, Colorado, Hawaii, Idaho, Montana, Nevada,

New Mexico, Oregon, Utah, Washington, and Wyoming. Northeast: Connecticut, Maine, Massachusetts, New Hampshire, New Jersey, New York, Pennsylvania,

Rhode Island, and Vermont. South Central Atlantic: Alabama, Delaware, District of Columbia, Florida, Georgia, Kentucky, Maryland, Mississippi, North Carolina,

South Carolina, Tennessee, Virginia, and West Virginia.

Figure 15. Percentage of respondents who reported how often they felt the following conditions in the past two weeks
